# Supplementary material for: A graphene oxide-based fluorescent sensor for surfactants
Source: Royal Society of Chemistry journal article supplement (doi:10.1039/c9ay01783f), 2019-01-01
Supplement: c9ay01783f1.pdf [file c9ay01783f1.pdf]

## Supporting Information

### Graphene Oxide Based Fluorescent Sensor for Surfactants

Govindaraj Usha,<sup>a</sup> Ramesh Prakash,<sup>a</sup> Karuppasamy Karpagalakshmi,<sup>a</sup> Sundaram Ramalakshmi,<sup>a</sup>  
Lakshminarayanan Piramuthu,<sup>a</sup> Cheng Yang<sup>b</sup> and Narayanan Selvapalam<sup>a\*</sup>

<sup>a</sup>Center for Supramolecular Chemistry and Department of Chemistry, International Research Center, Kalasalingam Academy of Research and Education (Kalasalingam University), Krishnankoil, 626126 Tamil Nadu State, India. and <sup>b</sup>Key Laboratory of Green Chemistry & Technology of Ministry of Education, College of Chemistry, State Key Laboratory of Biotherapy, and Healthy Food Evaluation Research Center, Sichuan University, Chengdu 610064, China

Email:n.selvapalam@klu.ac.in

### Limit of Detection for CTAP

$$\text{LOD} = (3 \times 1002.631 / 54788) \times 10^{-6} \text{M} = 0.0549 \times 10^{-6} \text{M} = \mathbf{0.549 \times 10^{-7} \text{M}}$$

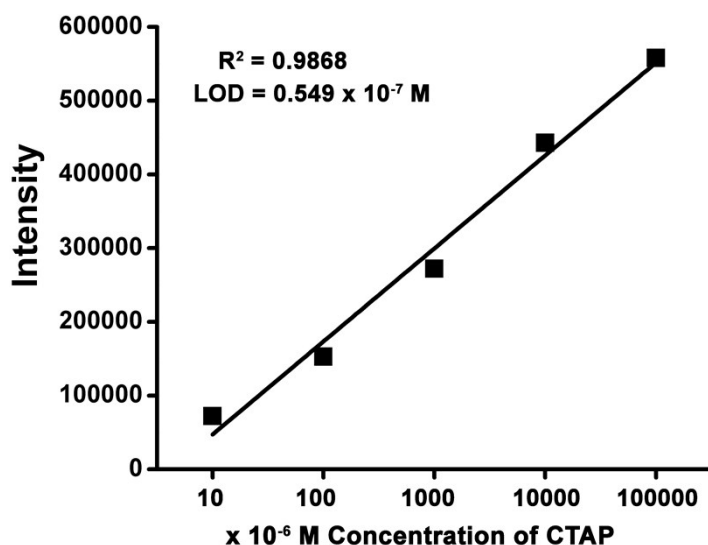

**Figure S1:** Linear plot of fluorescence intensity of CTAP at different concentration from  $10^{-1}$  to  $10^{-5} \text{ M}$

### Limit of Detection for SDS

$$\text{LOD} = (3 \times 1002.631 / 97995) \times 10^{-6} \text{M} = 0.03069 \times 10^{-6} \text{M} = \mathbf{0.306 \times 10^{-7} \text{M}}$$

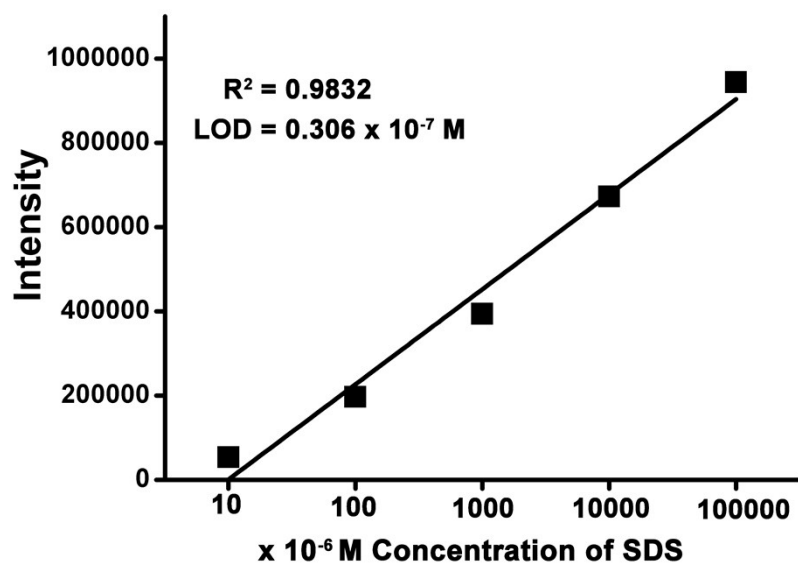

**Figure S2:** Linear plot of fluorescence intensity of SDS at different concentration from  $10^{-1}$  to  $10^{-5} \text{M}$ .

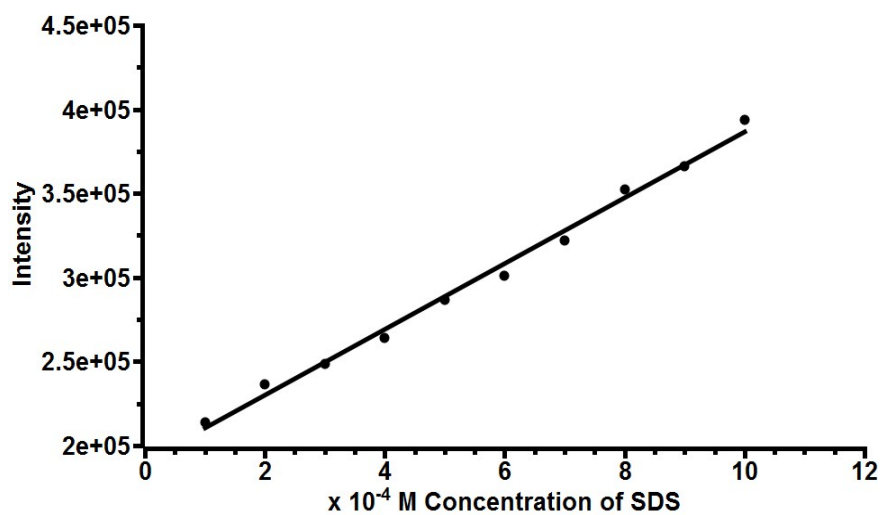

**Figure S3.** Calibration curve for SDS ( $10^{-3}$  to  $10^{-4} \text{M}$ ) using RBGO

Recycle potential of the sensor RBGO with SDS surfactant

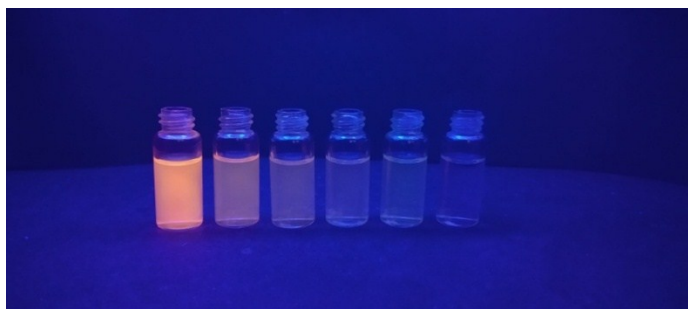

**Figure S4.** Recycle potential of the sensor RBGO has been examined with  $10^{-3}$  M concentration of SDS, which indicates that it last for less than two cycles.

#### Limit of Detection for TX100

$$\text{LOD} = (3 \times 1002.631 / 99659) \times 10^{-6} \text{M} = 0.03018 \times 10^{-6} \text{M} = \mathbf{0.301 \times 10^{-7} \text{M}}$$

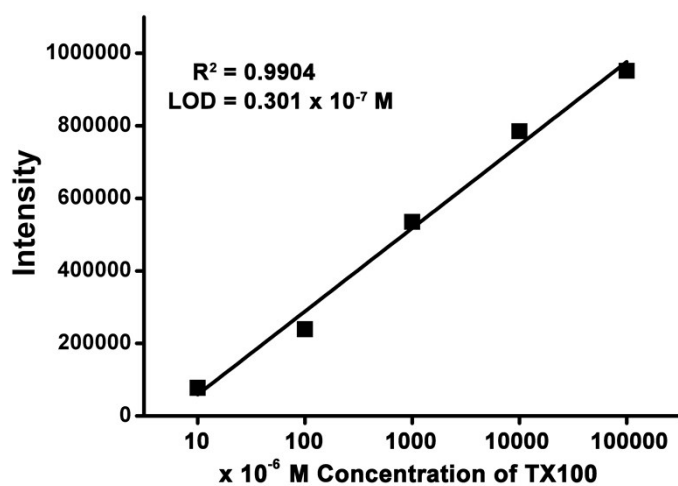

**Figure S5:** Linear plot of fluorescence intensity of TX100 at different concentration from  $10^{-1}$  to  $10^{-5}$  M.

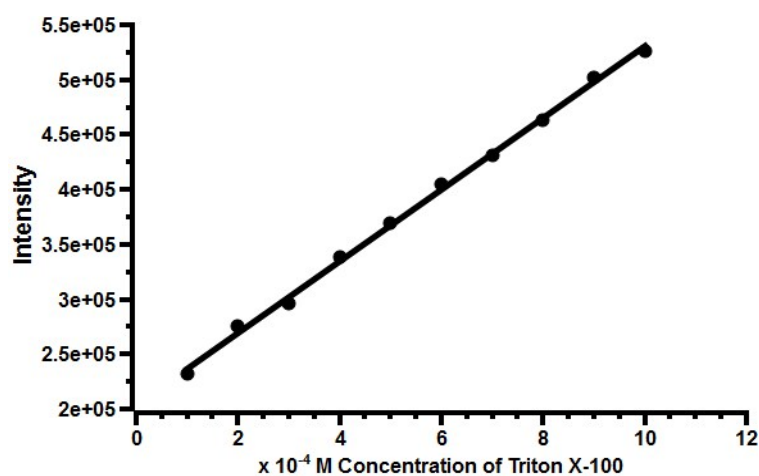

**Figure. S6.** Calibration curve for TX100 ( $10^{-3}$  to  $10^{-4}$  M) using RBGO
